# Supplementary material for: Effects of Landscape Features on Bird Community in Winter Urban Parks
Source: MDPI journal article supplement (doi:10.3390/ani12233442), 2022-12-06
Supplement: s1 [file s1]

**Table S1.** Landscape features of the 9 urban parks in Fuzhou, China.

| No. | Variable | Urban Parks  |                       |                |              |                  |            |                 |                |             |
|-----|----------|--------------|-----------------------|----------------|--------------|------------------|------------|-----------------|----------------|-------------|
|     |          | Chating Park | Helin Ecological Park | Jinjishan Park | Jinshan Park | Liming Lake Park | South Park | Hot Spring Park | West Lake Park | Zuohai Park |
| 1   | WaA      | 0.78         | 1.56                  | 0.03           | 6.25         | 3.25             | 0.48       | 1.76            | 15.90          | 9.55        |
| 2   | WaP      | 14.81        | 8.73                  | 0.11           | 18.28        | 51.41            | 13.56      | 10.65           | 54.14          | 32.99       |
| 3   | WaPD     | 133.04       | 145.23                | 9.95           | 90.67        | 158.32           | 169.37     | 272.05          | 64.68          | 75.98       |
| 4   | WSI      | 3.29         | 6.42                  | 1.76           | 6.31         | 3.33             | 3.01       | 3.71            | 4.28           | 3.76        |
| 5   | WoA      | 3.07         | 3.24                  | 26.62          | 20.90        | 1.58             | 0.85       | 8.52            | 11.73          | 14.98       |
| 6   | WoP      | 58.26        | 18.11                 | 88.32          | 61.13        | 25.00            | 23.89      | 51.50           | 39.94          | 51.73       |
| 7   | GrA      | 0.19         | 6.81                  | 1.65           | 4.49         | 0.55             | 0.58       | 2.92            | 1.66           | 3.49        |
| 8   | GrP      | 3.54         | 38.06                 | 5.48           | 13.14        | 8.73             | 16.40      | 17.66           | 5.64           | 12.04       |
| 9   | SeA      | 1.22         | 6.27                  | 1.82           | 2.52         | 0.94             | 1.63       | 3.34            | 0.08           | 0.93        |
| 10  | SeP      | 23.19        | 35.02                 | 6.03           | 7.38         | 14.86            | 46.14      | 20.19           | 0.28           | 3.21        |
| 11  | PA       | 5.26         | 17.90                 | 30.14          | 34.19        | 6.32             | 3.54       | 16.54           | 29.37          | 28.96       |
| 12  | PP       | 1140.33      | 2378.73               | 3428.29        | 4043.60      | 1356.70          | 921.35     | 2108.05         | 2828.61        | 2961.56     |
| 13  | PSI      | 140.24       | 158.59                | 176.16         | 195.08       | 152.28           | 138.09     | 146.22          | 147.23         | 155.26      |
| 14  | DistT    | 5.43         | 1.31                  | 1.37           | 0.83         | 5.99             | 5.71       | 2.17            | 3.46           | 2.63        |
| 15  | DistC    | 1.96         | 5.33                  | 3.34           | 7.30         | 1.64             | 2.92       | 2.31            | 1.36           | 2.23        |
| 16  | DistF    | 9.34         | 8.17                  | 6.29           | 13.20        | 8.47             | 9.91       | 6.61            | 6.29           | 5.55        |
| 17  | WoP500   | 25.48        | 26.62                 | 89.95          | 46.89        | 71.51            | 22.62      | 44.85           | 69.39          | 75.68       |
| 18  | SeP500   | 74.68        | 66.93                 | 54.77          | 55.68        | 60.92            | 75.10      | 63.93           | 37.92          | 36.02       |

WaA, waterbody area; WaP, waterbody proportion; WaPD, waterbody patches density; WSI, waterbody shape index; WoA, woodland area; WoP, woodland proportion; GrA, grassland area; GrP, grassland proportion; SeA, sealed surface area; SeP, sealed surface proportion; PA, park area; PP, park perimeter; PSI, park shape index; DistT, distance to Fuzhou Third Ring Road; DistC, distance to city center; DistF, distance to Fuzhou National Forest Park. WoP500, woodland proportion of 500m; SeP500, sealed surface proportion of 500m.

**Table S2.** Checklist and abundance of birds in the study area.

| No. | Species name            | Scientific name                 | Family              | Order                   | Endangerment Category | Residence types | Total numbers | Guild |
|-----|-------------------------|---------------------------------|---------------------|-------------------------|-----------------------|-----------------|---------------|-------|
| 1   | Little Grebe            | <i>Tachybaptus ruficollis</i>   | <i>Podicedidae</i>  | <i>Podicipediformes</i> |                       | R               | 15            | O     |
| 2   | Common Kingfisher       | <i>Alcedo atthis</i>            | <i>Alcedinidae</i>  | <i>Coraciiformes</i>    |                       | R               | 3             | C     |
| 3   | Pied Kingfisher         | <i>Ceryle rudis</i>             |                     |                         |                       | R               | 7             | O     |
| 4   | Spotted Dove            | <i>Spilopelia chinensis</i>     | <i>Columbidae</i>   | <i>Columbiformes</i>    |                       | R               | 2             | H     |
| 5   | Oriental Turtle Dove    | <i>Streptopelia orientalis</i>  |                     |                         |                       | R               | 41            | O     |
| 6   | Common Moorhen          | <i>Gallinula chloropus</i>      | <i>Rallidae</i>     | <i>Gruiformes</i>       |                       | R               | 3             | O     |
| 7   | White-breasted Waterhen | <i>Amaurornis phoenicurus</i>   |                     |                         |                       | R               | 11            | O     |
| 8   | Silver Pheasant         | <i>Lophura nycthemera</i>       | <i>Phasianidae</i>  | <i>Galliformes</i>      | Class II              | R               | 5             | O     |
| 9   | Greater Coucal          | <i>Centropus sinensis</i>       | <i>Cuculidae</i>    | <i>Cuculiformes</i>     | Class II              | R               | 3             | I     |
| 10  | Light-vented Bulbul     | <i>Pycnonotus sinensis</i>      | <i>Pycnonotidae</i> | <i>Passeriformes</i>    |                       | R               | 349           | O     |
| 11  | Red-whiskered Bulbul    | <i>Pycnonotus jocosus</i>       |                     |                         |                       | R               | 4             | O     |
| 12  | Black Bulbul            | <i>Hypsipetes leucocephalus</i> |                     |                         |                       | R               | 8             | I     |
| 13  | Chestnut Bulbul         | <i>Hemixos castanonotus</i>     |                     |                         |                       | R               | 2             | I     |
| 14  | Mountain Bulbul         | <i>Ixos mccllellandii</i>       |                     |                         |                       | R               | 2             | O     |
| 15  | Sooty-headed Bulbul     | <i>Pycnonotus aurigaster</i>    |                     |                         |                       | R               | 33            | I     |

|    |                               |                                      |                       |                       |   |     |   |
|----|-------------------------------|--------------------------------------|-----------------------|-----------------------|---|-----|---|
| 16 | Long-tailed Shrike            | <i>Lanius schach</i>                 | <i>Laniidae</i>       |                       | R | 590 | O |
| 17 | Chinese Grey Shrike           | <i>Lanius sphenocercus</i>           |                       |                       | W | 5   | H |
| 18 | Common Blackbird              | <i>Turdus merula</i>                 | <i>Turdidae</i>       |                       | R | 59  | I |
| 19 | Pale Thrush                   | <i>Turdus pallidus</i>               |                       |                       | W | 12  | I |
| 20 | Black-naped Oriole            | <i>Oriolus chinensis</i>             | <i>Oriolidae</i>      |                       | S | 16  | H |
| 21 | White Wagtail                 | <i>Motacilla alba</i>                | <i>Motacillidae</i>   |                       | R | 6   | O |
| 22 | Olive-backed Pipit            | <i>Anthus hodgsoni</i>               |                       |                       | W | 18  | I |
| 23 | Scarlet Minivet               | <i>Pericrocotus speciosus</i>        | <i>Passeriformes</i>  |                       | R | 6   | O |
| 24 | Ashy Drongo                   | <i>Dicrurus leucophaeus</i>          | <i>Dicruridae</i>     |                       | S | 2   | I |
| 25 | Hair-crested Drongo           | <i>Dicrurus hottentottus</i>         |                       |                       | S | 47  | I |
| 26 | Black-collared Starling       | <i>Gracupica nigricollis</i>         | <i>Sturnidae</i>      |                       | R | 18  | O |
| 27 | Crested Myna                  | <i>Acridotheres cristatellus</i>     |                       |                       | R | 13  | I |
| 28 | White-cheeked Starling        | <i>Spodiopsar cineraceus</i>         |                       |                       | W | 9   | H |
| 29 | Yellow-browed Warbler         | <i>Phylloscopus inornatus</i>        | <i>Phylloscopidae</i> |                       | W | 6   | H |
| 30 | Pallas's Leaf Warbler         | <i>Phylloscopus proregulus</i>       |                       |                       | W | 3   | I |
| 31 | Rufous-capped Babbler         | <i>Stachyridopsis ruficeps</i>       | <i>Timaliidae</i>     |                       | R | 126 | H |
| 32 | Eurasian Tree Sparrow         | <i>Passer montanus</i>               | <i>Passeridae</i>     |                       | R | 3   | I |
| 33 | White-rumped Munia            | <i>Lonchura striata</i>              |                       |                       | R | 42  | I |
| 34 | Hawfinch                      | <i>Coccothraustes coccothraustes</i> |                       |                       | W | 2   | O |
| 35 | Japanese Tit                  | <i>Parus minor</i>                   | <i>Paridae</i>        |                       | R | 1   | H |
| 36 | Plain Prinia                  | <i>Prinia inornata</i>               | <i>Cisticolidae</i>   |                       | R | 6   | O |
| 37 | Yellow-bellied Prinia         | <i>Prinia flaviventris</i>           |                       |                       | R | 10  | H |
| 38 | Brownish-flanked Bush Warbler | <i>Horornis fortipes</i>             | <i>Cettiidae</i>      |                       | R | 2   | I |
| 39 | Manchurian Bush Warbler       | <i>Horornis borealis</i>             |                       |                       | W | 196 | I |
| 40 | Fork-tailed Sunbird           | <i>Aethopyga christinae</i>          | <i>Nectariniidae</i>  |                       | R | 90  | I |
| 41 | Oriental Magpie Robin         | <i>Copsychus saularis</i>            | <i>Muscicapidae</i>   |                       | R | 5   | I |
| 42 | Daurian Redstart              | <i>Phoenicurus auroreus</i>          |                       |                       | W | 3   | O |
| 43 | Asian Brown Flycatcher        | <i>Muscicapa dauurica</i>            |                       |                       | T | 3   | O |
| 44 | White-crowned Forktail        | <i>Enicurus leschenaulti</i>         |                       |                       | R | 46  | O |
| 45 | Orange-flanked Bluetail       | <i>Tarsiger cyanurus</i>             |                       |                       | W | 24  | H |
| 46 | Japanese White-eye            | <i>Zosterops japonicus</i>           | <i>Zosteropidae</i>   |                       | R | 407 | O |
| 47 | Red-billed Blue Magpie        | <i>Urocissa erythroryncha</i>        | <i>Corvidae</i>       |                       | R | 8   | I |
| 48 | Azure-winged Magpie           | <i>Cyanopica cyanus</i>              |                       |                       | R | 70  | I |
| 49 | Japanese Grosbeak             | <i>Eophona personata</i>             | <i>Fringillidae</i>   |                       | W | 10  | O |
| 50 | Chinese Grosbeak              | <i>Eophona migratoria</i>            |                       |                       | W | 270 | O |
| 51 | Orange-bellied Leafbird       | <i>Chloropsis hardwickii</i>         | <i>Chloropseidae</i>  |                       | R | 3   | H |
| 52 | Common Tailorbird             | <i>Orthotomus sutorius</i>           | <i>Sylviidae</i>      |                       | R | 1   | O |
| 53 | Masked Laughingthrush         | <i>Garrulax perspicillatus</i>       | <i>Leiothrichidae</i> |                       | R | 37  | O |
| 54 | Hwamei                        | <i>Garrulax canorus</i>              | <i>Leiothrichidae</i> | Class II              | R | 2   | I |
| 55 | Black-throated Bushtit        | <i>Aegithalos concinnus</i>          | <i>Aegithalidae</i>   |                       | R | 7   | O |
| 56 | Fire-breasted Flowerpecker    | <i>Dicaeum ignipectus</i>            | <i>Dicaeidae</i>      |                       | R | 2   | C |
| 57 | Black-crowned Night Heron     | <i>Nycticorax nycticorax</i>         | <i>Ardeidae</i>       | <i>Pelecaniformes</i> | R | 64  | C |
| 58 | Little Egret                  | <i>Egretta garzetta</i>              |                       |                       | R | 41  | C |
| 59 | Chinese Pond Heron            | <i>Ardeola bacchus</i>               |                       |                       | R | 2   | C |

|    |             |                           |                 |                     |  |   |    |   |
|----|-------------|---------------------------|-----------------|---------------------|--|---|----|---|
| 60 | Great Egret | <i>Ardea alba</i>         |                 |                     |  | W | 88 | C |
| 61 | Mallard     | <i>Anas platyrhynchos</i> | <i>Anatidae</i> | <i>Anseriformes</i> |  | W | 5  | O |

R, residents; W, winter migrants; S, summer residents; T, travelers.  
Class II, Class II of the "List of key protected wild animals in China".  
O, Omnivorous; C, Camivorous; I, Insectivorous; C, Camivorous.

**Table S3.** Multiple linear regression models simulating the relationships between bird diversity and landscape features.

| No.                           | Model                          | F     | R <sup>2</sup> <sub>adj</sub> | P       | AICc   | ΔAICc | W <sub>i</sub> | df |
|-------------------------------|--------------------------------|-------|-------------------------------|---------|--------|-------|----------------|----|
| Overall bird abundance        |                                |       |                               |         |        |       |                |    |
| 1                             | ABU = 13.81PA + 55.12          | 16.2  | 0.66                          | 0.005   | 119.75 | 0     | 0.34           | 3  |
| Overall bird richness         |                                |       |                               |         |        |       |                |    |
| 2                             | RIC = 0.33PA + 0.23PSI - 19.78 | 28.47 | 0.87                          | < 0.001 | 58.52  | 0     | 0.28           | 3  |
| Overall bird α-diversity      |                                |       |                               |         |        |       |                |    |
| 3                             | DIV = 0.01PSI + 0.70           | 6.99  | 0.43                          | 0.033   | 5.71   | 0     | 0.28           | 3  |
| Resident bird abundance       |                                |       |                               |         |        |       |                |    |
| 4                             | ABU = 7.53PSI - 906.26         | 12.19 | 0.58                          | 0.01    | 119.00 | 0     | 0.39           | 3  |
| Resident bird richness        |                                |       |                               |         |        |       |                |    |
| 5                             | RIC = 0.24WoP + 3.18WSI - 6.78 | 47.67 | 0.92                          | < 0.001 | 48.61  | 0     | 0.83           | 4  |
| Resident bird α-diversity     |                                |       |                               |         |        |       |                |    |
| 6                             | DIV = 0.01WoP + 0.12WSI + 1.10 | 8.67  | 0.66                          | 0.017   | 7.65   | 0     | 0.24           | 4  |
| Winter migrant bird abundance |                                |       |                               |         |        |       |                |    |
| 7                             | AUB = 2.37PA - 1.37            | 20.9  | 0.71                          | 0.003   | 85.74  | 0     | 0.41           | 3  |
| Winter migrant bird richness  |                                |       |                               |         |        |       |                |    |
| 8                             | RIC = 0.12PA + 1.76            | 7.85  | 0.4612                        | 0.026   | 40.41  | 0     | 0.28           | 3  |

R<sup>2</sup><sub>adj</sub>: adjusted coefficient of determination.

AICc = AIC (model)+(2k (k + 1)/(n-k-1)).

W<sub>i</sub>: Akaike weight of each model,  $W_i = \exp(-0.5AICc)/\sum \exp(-0.5\Delta AICc)$ .

DIV, α-diversity of birds; RIC, bird species richness; ABU, bird abundance.

\*Optimal models were selected as the final models.
